# Supplementary material
Source: PubMed Central journal article supplement (PMC5442988)
Supplement: NIHMS851827-supplement-6.pdf [file NIHMS851827-supplement-6.pdf]

**Question 1:**

Recent advances in stem cell research led to the generation of kidney organoids from human pluripotent stem cells. What cell types can be induced from human pluripotent stem cells in kidney organoids? ?

- Podocytes
- Proximal tubules
- Loops of Henle
- Distal tubules
- All of the above

*Explanation:*

Establishment of induction methods of nephron progenitor cells from human pluripotent stem cells resulted in the generation of whole nephron segments including podocytes, proximal tubules, loops of Henle, and distal tubules.
